1 **Anterior Cleft Palate due to Cbfb deficiency and its rescue by folic acid**

2

3 Safiye E. Sarper<sup>1,2</sup>, Toshihiro Inubushi<sup>1</sup>, Hiroshi Kurosaka<sup>1</sup>, Hitomi Ono Minagi<sup>3</sup>, Yuka Murata<sup>1</sup>, Koh-ichi  
4 Kuremoto<sup>4</sup>, Takayoshi Sakai<sup>3</sup>, Ichiro Taniuchi<sup>5</sup>, Takashi Yamashiro<sup>1\*</sup>.

5

6 <sup>1</sup>Department of Orthodontics and Dentofacial Orthopedics, Graduate School of Dentistry, Osaka  
7 University, Osaka, Japan

8 <sup>2</sup>Laboratory of Theoretical Biology, Graduate School of Sciences, Osaka University,  
9 Osaka, Japan

10 <sup>3</sup>Department of Oral-facial Disorders, Osaka University Graduate School of Dentistry, Osaka, Japan

11 <sup>4</sup>Department of Advanced Prosthodontics, Graduate School of Biomedical & Health Sciences, Hiroshima  
12 University, Hiroshima, Japan

13 <sup>5</sup>Laboratory for Transcriptional Regulation, RIKEN Research Center for Allergy and Immunology,  
14 Yokohama, Japan

15

16 \* Correspondence to Takashi Yamashiro, Department of Orthodontics and Dentofacial Orthopedics,  
17 Graduate School of Dentistry, Osaka University

18 1-8 Yamada-Oka, Suita, OSAKA 565-0871, Japan

19 TEL: +81-6-6879-2958 FAX: +81-6-6879-2960 E-mail: [yamashiro@dent.osaka-u.ac.jp](mailto:yamashiro@dent.osaka-u.ac.jp)

20 ORCID ID: 0000-0002-4419-9643

21

22 **Keywords**

23 Cleft palate, Cbfb, Folic acid, Stat3, Palatogenesis

24

25 **Summary Statement**

26 Epithelial deletion of *Cbfb* results in an anterior cleft palate with impaired fusion of the palatal process

27 and folic acid application rescues the mutant phenotype with Stat3 activation *in vitro*.

28 **Abstract**

29 Core binding factor  $\beta$  (Cbfb) is a cofactor of Runx transcription factors. Among Runx transcription factors,  
30 Runx1 is a prerequisite for anterior-specific palatal fusion. However, whether Cbfb serves as a modulator  
31 or obligatory factor in Runx signaling that regulates palatogenesis is unclear. We herein report that Cbfb  
32 is essential and indispensable in anterior palatogenesis. Palatal fusion in *Cbfb* mutants is disturbed due  
33 to failed disintegration of the fusing epithelium specifically at the anterior portion, as is observed in  
34 *Runx1* mutants. In this mutants, the *Tgfb3* expression is disturbed at the corresponding area of the failed  
35 palatal fusion, where phosphorylation of Stat3 is also disturbed. TGFB3 protein rescues the palatal  
36 fusion *in vitro*. Strikingly, the anterior cleft palate in *Cbfb* mutants is further rescued by pharmaceutical  
37 application of folic acid that activates suppressed Stat3 phosphorylation and *Tgfb3* expression *in vitro*.  
38 With these findings, we provide the first evidence that Cbfb is a prerequisite for anterior palatogenesis as  
39 an obligatory cofactor in the Runx1/Cbfb-Stat3-Tgfb3 signaling axis. Furthermore, the rescue of the  
40 mutant cleft palate using folic acid may elucidate potential therapeutic targets by Stat3 modification for  
41 the prevention and pharmaceutical intervention of cleft palate.

## 42 **Introduction**

43 Cleft palate is the most common congenital anomalies in humans, and its etiology is complex (Dixon et  
44 al., 2011; Murray, 2002). The palate is derived from the primary and secondary palate, which are located  
45 in the anterior and posterior portions of the palate, respectively (Gu et al., 2008). Palatal fusion is  
46 essential in palatogenesis, and its defect leads to cleft palate. Two halves of the palatal process fuse in  
47 the middle to form the secondary palate, which further fuse with the primary palate and the nasal septum  
48 to form the definite palate (Ferguson, 1988).

49

50 Among various molecules regulating palatogenesis, Runx1 is involved in the regulation of palatal fusion  
51 specifically in the anterior region. Epithelial-specific loss of *Runx1* results in failure of palatal fusion  
52 specifically at the anterior portion between the primary and the secondary palate with failed  
53 disintegration of the medial-edge epithelium. In this mutants, the *Tgfb3* expression was disturbed among  
54 various molecules regulating palatogenesis, and Stat3 phosphorylation was also downregulated (Sarper  
55 et al., 2018). Since TGFB3 protein rescues the mutant cleft palate, Tgfb3 is critical in Runx1 signaling in  
56 palatogenesis (Sarper et al., 2018). Furthermore, Stat3 inhibitor disturbed the palatal fusion  
57 accompanied by the downregulation on the *Tgfb3* expression, suggesting that extrinsic modification of  
58 the Stat3 activity affects Tgfb3 signaling and may be a potential therapeutic target in pharmaceutical  
59 intervention for cleft palate (Sarper et al., 2018).

60

61 Core binding factor  $\beta$  (Cbfb) is a cofactor of Runx family genes (*Runx1*, *Runx2* and *Runx3*) that forms a  
62 heterodimeric transcription complex (Huang et al., 2001). Cbfb enhances the binding affinity to DNA and  
63 also promotes Runx protein stability (Huang et al., 2001; Ogawa et al., 1993; Wang et al., 1993). Of  
64 note, Cbfb can act as either an obligate cofactor for the Runx function or a dispensable modulator of the  
65 Runx activity (Gau et al., 2017). For example, Cbfb acts as an obligate cofactor for the Runx function in  
66 hematopoietic cells (Chen et al., 2011) but as a dispensable modulator of the Runx activity in

67 skeletogenesis (Yoshida et al., 2002). However, the possible functional role of *Cbfb* in palatogenesis has  
68 not been investigated.

69

70 A human genome study demonstrated that *CBFb* haploinsufficiency due to an interstitial deletion caused  
71 cleft palate and congenital heart anomalies in human (Khan et al., 2006; Tsoutsou et al., 2013;  
72 Yamamoto et al., 2008). A chromosomal fragile site of FRA16B, which co-localizes with breakpoints  
73 within *CBFb* at the chromosomal locus 16q22.1., is also involved in the inheritance of cleft palate  
74 (McKenzie et al., 2002). However, whether *Cbfb* is an obligate cofactor or a dispensable modulator in  
75 *Runx1* signaling in palatogenesis has not been investigated.

76

77 Maternal folic acid supplementation has been shown to be as an effective intervention for reducing the  
78 risk of non-syndromic cleft palate (Millacura et al., 2017; Wehby and Murray, 2010). However, the  
79 mechanism by which folic acid prevents such structural anomalies in the fetus is still unknown (Obican et  
80 al., 2010). Interestingly, folic acid and folate can activate *Stat3* (Hansen et al., 2015; Wei et al., 2017).  
81 Our previous study has shown that pharmaceutical application of *Stat3* inhibitors disturbs the palatal  
82 fusion with downregulation of *Tgfb3*. Hence, it was assumed that folic acid might be a useful therapy for  
83 preventing the cleft palate via the extrinsic modification of *Stat3* activation to prevent cleft palate.

84

85 We herein report the first evidence that *Cbfb* is essential in anterior palatogenesis as an obligatory  
86 cofactor in the *Runx1/Cbfb-Stat3-Tgfb3* signaling axis. In addition, we also demonstrate the rescue of  
87 mutant cleft palate via pharmaceutical folic acid application, at least in part, by activating *Stat3*  
88 phosphorylation in the *Runx1/Cbfb-Tgfb3* signaling axis during palatogenesis.

89 **Results**

90 ***Palatal phenotypes in Cbfb mutants.***

91 The palatal phenotype was evaluated in vivo to see how Cbfb affect the palatal fusion using epithelial-  
92 specific conditional knockout mice (K14-Cre/Cbfb<sup>fl/fl</sup>) (Kurosaka et al., 2011).

93 The recombination efficiency of K14-Cre was evaluated in the developing palate previously (Sarper et  
94 al., 2018).

95

96 In this Cbfb mutants, anterior cleft was evident between the primary and secondary palates both at P0  
97 and P50 (Fig. 1A-D). The cleft was seen in 100% of the mutants (n=8) when evaluated at P0 (Fig. 1E). In  
98 histological sections (Fig. 1F), failed palatal fusion was also confirmed at the first rugae A-P level in Cbfb  
99 mutants at E17.0 (Fig. 1G-J). In the more posterior portion, the secondary palate did not contact to the  
100 primary palate or the nasal septum (Fig. 1K,L). These findings show that the morphological palatal  
101 phenotypes are similar to those in Runx1 mutants (Sarper et al., 2018).

102

103 ***Characterization of the mutant epithelium in palatal fusion***

104 In palatal fusion, the medial-edge epithelium terminates to proliferate and enters apoptosis (Cuervo and  
105 Covarrubias, 2004; Cui et al., 2005), and the periderms covering the fusing epithelium are sloughed off  
106 (Hu et al., 2015). The intervening epithelium then needs to be degraded in order to achieve  
107 mesenchymal confluence (Gritli-Linde, 2007).

108

109 At E15.0, immunostaining for K14 revealed that epithelium seam was present sparsely at the boundary  
110 between the primary and secondary palates in the control, whereas  
111 there was partial contact but no fusion in the mutant palatal epithelium between the primary and  
112 secondary palates (Fig. 2A, B) and in the anterior-most region of the secondary palate (data not shown).

113

114 The proliferative activity was evaluated using Ki67 staining. Double-staining for Ki67 and K14  
115 immunoreactivity showed that Ki67-positive proliferating cells were sparse at the fused epithelium in  
116 wild-types (Fig. 2C), whereas some immunoreactivity was retained in the epithelium in *Cbfb* mutants  
117 (Fig. 2D). Ki67-positive cells were quantified from the images and we found that the percentage cells  
118 for Ki67 in the mutants was significantly higher than in the wild-type palates (Fig. 2E).

119

120 TUNEL assay showed that apoptotic signals were evident in the fused epithelium in controls (Fig. 2F),  
121 whereas far fewer signals were detected on the unfused epithelium of the *Cbfb* mutants (Fig. 2G).

122 TUNEL-positive cells were quantified from the images and we found and TUNEL-positive cells at the  
123 fusing epithelium was significantly reduced in percentage in the mutants than in the controls (Fig. 2H).

124

125 During palatogenesis, the periderm of the secondary palate transiently covers the fusing palatal process  
126 and is sloughed before palatal fusion (Hu et al., 2015). Keratin 6 (K6) detects periderm (Richardson et  
127 al., 2014) and K6 immunoreactivity was sparsely observed in the epithelial remnants in the anterior  
128 regions of E15.0 wild-type mice (Fig. 2I). In contrast, K6-immunoreactive periderms in *Cbfb* mutants  
129 were retained on the unfused epithelial surface of the primary palate and the nasal side of the secondary  
130 palate and the nasal septum, indicating that the periderm had not been sloughed off at the anterior  
131 region of the palate by *Cbfb* deficiency (Fig. 2J).

132

133 Taken together, these findings show that *Cbfb* is essential for anterior palatal fusion and palatal fusion in  
134 *Cbfb* mutants could be due to failed disintegration of the epithelium in the anterior palate, as observed in  
135 *Runx1* mutants (Sarper et al., 2018).

136

137 ***The expression of Cbfb mRNA in the developing palate.***

138 The whole-mount *in situ* hybridization showed that *Cbfb* transcripts were widely distributed along the AP  
139 axis and not specifically in the anterior regions at E14.0 (Fig. 3A,B). The distribution of the *Cbfb* mRNA  
140 expression therefore does not explain why *Cbfb* deficiency caused an anterior-specific phenotype in  
141 palatogenesis. Sliced sections revealed that *Cbfb* transcripts were present in both the palatal epithelium  
142 and mesenchymal tissue (Fig. 3C). The *Runx1* expression was intense in the fusing region of the palatal  
143 shelves and in the primary palate regions (Fig. 3D), and the *Runx2* expression was present in the fusing  
144 region of the palatal process, however, *Runx2* expression was lower in the primary palate region than  
145 the secondary palate (Fig. 3E), as previously reported (Charoenchaikorn et al., 2009). *Runx3* was also  
146 detected in the fusing region of the palatal process (Fig. 3F).

147

#### 148 ***Altered mRNA expression in Cbfb mutant palate.***

149 To clarify the molecular mechanisms underlying the failed palatal fusion in *Cbfb* mutants, we evaluated  
150 the changes in several molecules that have been recognized as anterior-specific genes in palatogenesis.  
151 Whole-mount *in situ* hybridization revealed that the distribution of *Shox2*, *Msx2*, *Bmp4* or *Shh* (Baek et  
152 al., 2011; Hilliard et al., 2005; Li and Ding, 2007; Welsh and O'Brien, 2009) expression was not altered  
153 by *Cbfb* deficiency (Fig. 3G-N). However, *Tgfb3* was significantly decreased in *Cbfb* mutants in the  
154 anterior region of the palate (Fig. 3O,P). Higher magnification view demonstrated that significant  
155 decreases in *Tgfb3* signals was evident in the primary palate regions, while the *Tgfb3* expression in the  
156 secondary palate was not altered (Fig. 3Q,R). A qPCR analysis of the microdissected tissue also  
157 showed the downregulation of *Tgfb3* in the primary palate (Fig. 3S). *Mmp13* lies downstream of *Tgfb3*  
158 signaling in palatogenesis (Blavier et al., 2001). Higher magnification view of *Mmp13* expression also  
159 demonstrated that significant decreases in the signals was evident in the primary palate regions and at  
160 the anterior-most secondary palate corresponding to the 1<sup>st</sup> and 2<sup>nd</sup> rugae (Fig. 3T,U). qPCR analysis of  
161 microdissected tissue also confirmed marked downregulation of the expression of *Mmp13* expression in  
162 the primary palate (Fig. 3V).



163

164 These findings indicate that *Tgfb3* is one of the targets in *Cbfb* mutants, and the *Shh*, *Shox2* and *Msx1-*  
165 *Bmp4* pathways were not affected, as observed in *Runx1* mutants (Sarper et al., 2018).

166

167 ***Rescue of cleft palate in Cbfb mutant mice by TGFB3.***

168 Given the critical roles of *Tgfb3* in palatogenesis, downregulation of *Tgfb3* expression in *Cbfb* mutants  
169 might account for the failure of the palatal fusion. Therefore, we further investigated whether TGFB3  
170 protein can rescue the cleft palate in *Cbfb* mutants. TGFB3 beads the mutant cleft rescued by 80%,  
171 while BSA treatment did not rescue it at all (4/5, Fig. 4B), indicating that *Tgfb3* is critical in the cleft  
172 palate in *Cbfb* mutants. A qPCR demonstrated that the application of TGFB3 protein resulted in  
173 upregulation of *Mmp13* expression without *Tgfb3* induction in the microdissected tissue (Fig. 4C,D).  
174 Together, these findings indicated that *Tgfb3* is a critical target in the pathogenesis of the *Cbfb*  
175 mutant cleft.

176

177 ***Stat3 activity in Cbfb mutant palate.***

178 In our previous study using *Runx1* mutant mice, we demonstrated that Stat3 phosphorylation was  
179 disturbed by *Runx1* deficiency in the anterior region of the palate (Sarper et al., 2018). We therefore  
180 explored whether or not the Stat3 activity is affected during anterior palatal fusion in *Cbfb* mutants.

181

182 Immunoreactivity to Stat3 was present in the palatal epithelium, and some immunoreactivity was also  
183 observed in the mesenchyme (Fig.5A). *Cbfb* deficiency did not affect the Stat3 immunoreactivity  
184 (Fig.5B). In contrast, immunoreactivity to pStat3 was detected in the fusing or fused epithelium in wild-  
185 type (Fig. 5C), whereas pStat3 was remarkably downregulated in the primary palate in *Cbfb* mutants  
186 (Fig. 5D). A western blot analysis revealed a significant reduction in the immunoreactivity to pStat3 in the  
187 *Cbfb* mutant primary palate, while that to Stat3 was not affected (Fig. 5E).

188

189 ***Rescue of cleft palate of *Cbfb* mutants by folic acid.***

190 We then attempted to rescue the mutant cleft palate using folic acid application. A recent study showed  
191 that folic acid and folate activate STAT3 pathway (Hansen et al., 2015; Wei et al., 2017). We therefore  
192 investigated whether or not folic acid application could rescue the anterior cleft palate of *Cbfb* mutants.

193

194 After 48 h application of folic acid, histological observation confirmed the partial achievement of  
195 mesenchymal continuity by folic acid application in the mutant palatal explants (Fig. 6A). Folic acid  
196 application rescued the failed palatal fusion with a success rate of 67% (4/6, Fig. 6B). A western blot  
197 showed that folic acid activated pStat3 immunoreactivity, while the Stat3 was not altered in the dissected  
198 mutant primary palate (Fig. 6C). qPCR of the micro-dissected primary palate revealed that the  
199 expression of *Tgfb3* and *Mmp13* was upregulated by folic acid application (Fig. 6D,E).

## 200 Discussion

201 This present study provides the first genetic evidence of *Cbfb* being necessary for palatogenesis using  
202 conditional *Cbfb* null mutant mice. *Cbfb* deficiency resulted in anterior cleft between the primary and  
203 secondary palate and led to the failed disintegration of the contacting palatal epithelium as observed in  
204 *Runx1* mutants (Sarper et al., 2018). *Cbfb* forms a heterodimer with *Runx* genes. In hematopoietic  
205 development, the functional loss of either *Runx1* or *Cbfb* completely disturbed the function in  
206 hematopoietic cells, indicating that *Cbfb* act as an obligate cofactor for the Runx function (Chen et al.,  
207 2011; Chen et al., 2009; Gau et al., 2017). In contrast, *Cbfb* deficiency does not completely disturb the  
208 Runx2-dependent bone and cartilage formation (Yoshida et al., 2002), suggesting that Runx2 can  
209 regulate skeletogenesis to a limited degree even in the absence of *Cbfb* (Gau et al., 2017), and *Cbfb*  
210 acts as a dispensable modulator of Runx activity in skeletogenesis (Gau et al., 2017). Given the  
211 similarities in the anterior cleft palate observed after the loss of function of *Cbfb* or *Runx1*, *Cbfb* appears  
212 to serve as an obligate cofactor, rather than a modulator in Runx1/*Cbfb* signaling during palatogenesis.  
213

214 Our findings also provide the additional evidence that Runx signaling is important in the anterior  
215 palatogenesis and that *Tgfb3* is a critical downstream target. As observed in *Runx1* mutants (Sarper et  
216 al., 2018), *Tgfb3* expression was specifically downregulated in the *Cbfb* mutants and conversely, TGFB3  
217 protein beads rescued the failed palatal fusion in the mutant. Indeed, epithelial-specific depletion of  
218 *Tgfb3*, *Tgfb1* (*Alk5*), or *Tgfb2* results in anterior-specific palatal cleft (Dudas et al., 2006; Lane et al.,  
219 2015; Xu et al., 2006). On the other hand, pharmaceutical Stat3 inhibitor also disturbs the anterior palatal  
220 fusion with marked downregulation of *Tgfb3* expression (Sarper et al., 2018) and we found that Stat3  
221 phosphorylation was also disturbed in *Cbfb* mutants. Given that the obligatory roles of *Cbfb* in Runx1  
222 signaling, the downregulation of *Tgfb3* in the primary palate may account for the anterior-specific clefting  
223 in *Cbfb* mutants, as observed in *Runx1* mutants. In addition, these findings are the additional evidences

224 that support the essential roles of Runx1/Cbfb-Stat3-Tgfb3 signaling axis in anterior palatogenesis (Fig.  
225 7A-C).

226

227 One of the more striking findings is that the folic acid application rescued the cleft palate in *Cbfb*  
228 mutants. In humans, maternal folic acid supplementation has been proven an effective intervention for  
229 reducing the risk of non-syndromic cleft palate (Millacura et al., 2017; Wehby and Murray, 2010).  
230 However, the mechanism by which folic acid prevents structural anomalies in the fetus is still unknown  
231 (Obican et al., 2010). A recent study showed that folic acid can activate Stat3 (Hansen et al., 2015; Wei  
232 et al., 2017). In the present study, phosphorylation of Stat3 was activated by folic acid application in the  
233 dissected palatal tissue in culture. Conversely, a Stat3 inhibitor impairs anterior palatal fusion between  
234 the primary and secondary palates and disturbed the expression of *Tgfb3 in vitro* (Sarper et al., 2018).  
235 Taken together, these findings show that folic acid rescued the cleft palate of *Cbfb* mutants, presumably  
236 through the activation of Stat3. Furthermore, the rescue of the mutant cleft palate using folic acid may  
237 elucidate potential therapeutic targets by Stat3 modification for the prevention and pharmaceutical  
238 intervention of cleft palate (Fig. 7D).

239

240 In conclusion, the present study demonstrated that *Cbfb* is essential for anterior palatogenesis as an  
241 obligatory cofactor of Runx1/*Cbfb* signaling (Fig. 7A). In addition, we also demonstrate the rescue of  
242 mutant cleft palate via pharmaceutical folic acid application, at least in part, by activating Stat3  
243 phosphorylation in the Runx/*Cbfb*-*Tgfb3* signaling axis during palatogenesis (Fig.7D).

## 244 **Materials and Methods**

### 245 ***Animals***

246 *Cbfb*<sup>-/-</sup> mice are early lethal due to hemorrhaging between E11.5 and E13.5, when the palatal  
247 development is not yet initiated (Sasaki et al., 1996). To assess the role of *Cbfb* in the oral epithelium,  
248 we use epithelial-specific knock-out mice created through the *Cre/loxP* system (*K14-Cre/Cbfb*<sup>fl/fl</sup>), as  
249 described in a previous study (Kurosaka et al., 2011). We used their littermates that did not carry  
250 the *K14-Cre/Cbfb*<sup>fl/fl</sup> genotype as controls.

251

### 252 ***Assessment of palatal fusion and a histological analysis***

253 The palatal phenotypes were first evaluated with a dissecting microscope. For histology, dissected  
254 samples were fixed in 4% paraformaldehyde at 4 °C overnight. The samples were then dehydrated,  
255 embedded in paraffin, serially sectioned at 7 µm, and stained with hematoxylin and eosin. For  
256 cryosections, the samples were dehydrated in 15% and 30% sucrose in DEPC-treated PBS overnight at  
257 4 °C, embedded in Tissue-Tek (OCT compound, Sakura). The tissue samples were sectioned into 10 µm  
258 slice.

259

### 260 ***Immunohistochemistry***

261 Immunofluorescence staining was performed using polyclonal rabbit-anti-Ki67 (1:400, ab15580, Abcam),  
262 polyclonal rabbit anti-K6 (1:200, #4543, 905701, Biolegend), monoclonal anti-K14 (1:200, ab7880,  
263 Abcam), monoclonal rabbit anti-phospho-Stat3 (pStat3, 1:200, #9145, Cell Signaling Technology),  
264 monoclonal rabbit anti-Stat3 (1:200, #9139, Cell Signaling Technology) overnight at 4°C. Alexa488-  
265 conjugated goat-anti-rabbit IgG (1:400, A21206, Molecular Probes) or Alexa546-conjugated goat-anti-  
266 mouse IgG (1:400, A11003, Molecular Probes) was used as secondary antibody. DAPI (1:500,  
267 Dojindo) was used for nuclear staining and the sections were mounted with fluorescent mounting medium  
268 (Dako). At least three embryos of each genotype were used for each analysis.

269

270 The percentage of proliferating cells at the fusing or contacting epithelium between the primary and the  
271 secondary palate was determined by counting Ki67-positive cells as a percentage of the total number of  
272 cells, as determined by DAPI staining.

273

#### 274 ***Laser microdissection***

275 The dissected heads were freshly embedded in OCT compound (Tissue Tek, Sakura) and frozen  
276 immediately. Then, tissues were serially sectioned at a thickness of 25  $\mu$ m on a cryostat (Leica CM  
277 1950). Theater, the sections were mounted on a film-coated slide. From the anterior palate at E15.0,  
278 12-14 serial sections were obtained on total and stained with Cresyl violet. Palatal tissues at the border  
279 between the primary and the secondary palate were dissected from the sample sections using a manual  
280 laser-capture microdissection system (LMD6500, Leica) and collected into tubes.

281

#### 282 ***RNA Extraction and a real-time RT-PCR Analysis***

283 Total RNA was extracted from the laser-microdissected tissues or dissected tissues using IsogenII  
284 (Nippon Gene, Toyama, Japan) according to the manufacturer's protocol, then reverse transcribed to  
285 cDNA using an oligo (dT) with reverse transcriptase (Takara, Osaka, Japan). For real-time RT-PCR, the  
286 cDNA was amplified with TaqDNA Polymerase (Toyobo Sybr Green Plus, Osaka, Japan) using a light  
287 cycler (Roche). *Gapdh* was used as a housekeeping gene. Primer sequences are shown previously  
288 (Sarper et al., 2018). At least three embryos of each genotype were used for each analysis.

289

#### 290 ***Whole-mount in situ hybridization***

291 Whole-mount in situ hybridization was performed using fixed E14.0, E14.5 and E15.0 palates. The  
292 digoxigenin-labeled RNA probes were prepared using a DIG RNA labeling kit according to the  
293 manufacturer's protocol (Roche) using each cDNA clone as the template. The probes were synthesized

294 from fragments of *Cbfb*, *Runx1*, *Runx2*, *Runx3*, *Shox2*, *Msx1*, *Shh*, *Bmp4*, *Tgfb3*, and *Mmp13* (Allen  
295 Institute for Brain Science) and amplified with T7 and SP6 adaptor primers through PCR, as described  
296 previously (Sarper et al., 2018). After hybridization, the signals were visualized according to their  
297 immunoreactivity with anti-digoxigenin alkaline phosphatase-conjugated Fab fragments (Roche). At least  
298 three embryos of each genotype were used for each analysis.

299

### 300 ***TUNEL staining***

301 To detect apoptotic cells, the TUNEL assay was performed according to the manufacturer's  
302 instructions (ApopTag; Chemicon). Frozen sections (10  $\mu$ m) were prepared and the stained sections  
303 were counterstained with methyl green. At least three embryos of each genotype were used for each  
304 analysis.

305

306 The percentage of apoptotic cells along the contacting or fused epithelium between the primary and the  
307 secondary palate was determined by TUNEL-positive cells as a percentage of the total number of cells,  
308 as determined by methyl green staining.

309

### 310 ***Rescue of the mutant clef palate using TGFB3 protein or folic acid***

311 The dissected palate of the E15.0 mutants was cultured on a Nuclepore filter (Whatman, Middlesex, UK)  
312 in Trowell type organ culture in chemically defined medium (BGJb: gibco /life technologies). Affi-Gel  
313 beads (Bio-Rad) were incubated in TGFB3 (100 ng/ $\mu$ l, R&D Systems) and placed on the primary  
314 palate of the *Cbfb* mutant explants, as described previously (Sarper et al., 2018). Bovine serum  
315 albumin (BSA) was used for the control beads. Fusion of the palatal process was evaluated  
316 histologically. The anterior portion of the palates was also dissected under the microscope and total  
317 RNA was extracted from these samples for pPCR analysis.

318

319 To evaluate the possible rescue of cleft palate in *Cbfb* mutants by folic acid application, the palatal  
320 explants were cultured for 48 h in BGJb (Gibco) culture medium containing folic acid (N<sup>5</sup>-formyl-5,6,7,8-  
321 tetrahydropteroyl-L-glutamic acid) (Sigma) at a final concentration of 100 µg/ml. After culture, the *in vitro*  
322 explants were fixed at each stage in 4% paraformaldehyde overnight and then processed for histological  
323 observation.

324

### 325 **Western blot analysis**

326 For western blotting, the primary palate of *Cbfb* mutants was dissected and then cut in half. Each half of  
327 the explants was cultured with or without folic acid for 48 hours.

328

329 The dissected samples were lysed with RIPA buffer (nacalai tesque) supplemented with protease and  
330 phosphatase inhibitors (nacalai tesque). The lysates were centrifuged and the supernatant was heated in  
331 denaturing Laemmli buffer (Bio-rad Laboratories). Proteins were separated by SDS-PAGE and  
332 transferred to polyvinylidene difluoride membranes (Bio-rad Laboratories).

333

334 The membranes were incubated with anti-Stat3 (1:1000, #9139, Cell Signaling Technology), anti-pStat3  
335 (1:1000, #9145, Cell Signaling Technology), anti-β-actin (1:2000, Sigma) or anti-α-tubulin (1:1000,  
336 Invitrogen). The bound antibodies were detected with HRP-linked antibody (1:1,000, Cell Signaling  
337 Technology) and an ECL detection kit (Bio-rad Laboratories).

338

### 339 **Statistical analyses**

340 Quantitative variables in the two groups were compared using the Mann-Whitney *U* test. Differences  
341 among the three groups were determined using the analysis of variance (ANOVA) test, and  
342 significant effects indicated by the ANOVA were further analyzed with post hoc Bonferroni correction.



343 *P* values < 0.05 were considered significant. Significance was determined using the statistical  
344 analysis software program JMP, version 5 (SAS Institute Inc.)

345

346 ***Study approval***

347 All of the animal experiments were performed in strict accordance with the guidelines of the Animal Care  
348 and Use Committee of the Osaka University Graduate School of Dentistry, Osaka, Japan. The protocol  
349 was approved by the Committee on the Ethics of Animal Experiments of Osaka University Graduate  
350 School of Dentistry. Mice were housed in the animal facility at the Department of Dentistry, Osaka  
351 University. Welfare guidelines and procedures were performed with the approval of the Osaka University  
352 Graduate School of Dentistry Animal Committee.

353 **Acknowledgments**

354 We thank Ms. Yuriko Nogami for the excellent care and maintenance of our mouse colony and her  
355 valuable assistance in the histological, molecular and protein work.

356

357 **Competing interests**

358 The authors declare no conflicts of interest in association with the present study.

359

360 **Funding**

361 This work was supported by grants-in-aid for scientific research program from the Japan Society for the  
362 Promotion of Science (#15H02577, #17K19754 and #24249093, to TY).

363

364 ***Author contributions statement***

365 T.Y. designed the study. S.E.S., T.I., H.K., H.O.M., Y.M. and T.S. performed and/or analyzed  
366 experiments. I.T. and K.K. provided experimental reagents and participated in the discussions. T.Y. and  
367 S.E.S. wrote the manuscript with input from all authors. All authors read and approved the final  
368 manuscript.

369

## 370 **References**

- 371 Baek, J.A., Lan, Y., Liu, H., Maltby, K.M., Mishina, Y., Jiang, R., 2011. Bmpr1a signaling plays critical  
372 roles in palatal shelf growth and palatal bone formation. *Dev Biol* 350, 520-531.
- 373 Blavier, L., Lazaryev, A., Groffen, J., Heisterkamp, N., DeClerck, Y.A., Kaartinen, V., 2001. TGF-beta3-  
374 induced palatogenesis requires matrix metalloproteinases. *Mol Biol Cell* 12, 1457-1466.
- 375 Charoenchaikorn, K., Yokomizo, T., Rice, D.P., Honjo, T., Matsuzaki, K., Shintaku, Y., Imai, Y.,  
376 Wakamatsu, A., Takahashi, S., Ito, Y., Takano-Yamamoto, T., Thesleff, I., Yamamoto, M., Yamashiro,  
377 T., 2009. Runx1 is involved in the fusion of the primary and the secondary palatal shelves. *Dev Biol*  
378 326, 392-402.
- 379 Chen, M.J., Li, Y., De Obaldia, M.E., Yang, Q., Yzaguirre, A.D., Yamada-Inagawa, T., Vink, C.S.,  
380 Bhandoola, A., Dzierzak, E., Speck, N.A., 2011. Erythroid/myeloid progenitors and hematopoietic  
381 stem cells originate from distinct populations of endothelial cells. *Cell Stem Cell* 9, 541-552.
- 382 Chen, M.J., Yokomizo, T., Zeigler, B.M., Dzierzak, E., Speck, N.A., 2009. Runx1 is required for the  
383 endothelial to haematopoietic cell transition but not thereafter. *Nature* 457, 887-891.
- 384 Cuervo, R., Covarrubias, L., 2004. Death is the major fate of medial edge epithelial cells and the cause  
385 of basal lamina degradation during palatogenesis. *Development* 131, 15-24.
- 386 Cui, X.M., Shiomi, N., Chen, J., Saito, T., Yamamoto, T., Ito, Y., Bringas, P., Chai, Y., Shuler, C.F., 2005.  
387 Overexpression of Smad2 in Tgf-beta3-null mutant mice rescues cleft palate. *Dev Biol* 278, 193-202.
- 388 Dixon, M.J., Marazita, M.L., Beaty, T.H., Murray, J.C., 2011. Cleft lip and palate: understanding genetic  
389 and environmental influences. *Nat Rev Genet* 12, 167-178.
- 390 Dudas, M., Kim, J., Li, W.Y., Nagy, A., Larsson, J., Karlsson, S., Chai, Y., Kaartinen, V., 2006. Epithelial  
391 and ectomesenchymal role of the type I TGF-beta receptor ALK5 during facial morphogenesis and  
392 palatal fusion. *Dev Biol* 296, 298-314.
- 393 Ferguson, M.W., 1988. Palate development. *Development* 103 Suppl, 41-60.
- 394 Gau, P., Curtright, A., Condon, L., Raible, D.W., Dhaka, A., 2017. An ancient neurotrophin receptor  
395 code; a single Runx/Cbfbeta complex determines somatosensory neuron fate specification in zebrafish.  
396 *PLoS Genet* 13, e1006884.
- 397 Gritli-Linde, A., 2007. Molecular control of secondary palate development. *Dev Biol* 301, 309-326.
- 398 Gu, S., Wei, N., Yu, X., Jiang, Y., Fei, J., Chen, Y., 2008. Mice with an anterior cleft of the palate survive  
399 neonatal lethality. *Dev Dyn* 237, 1509-1516.

- 400 Hansen, M.F., Greibe, E., Skovbjerg, S., Rohde, S., Kristensen, A.C., Jensen, T.R., Stentoft, C., Kjær,  
401 K.H., Kronborg, C.S., Martensen, P.M., 2015. Folic acid mediates activation of the pro-oncogene  
402 STAT3 via the Folate Receptor alpha. *Cell Signal* 27, 1356-1368.
- 403 Hilliard, S.A., Yu, L., Gu, S., Zhang, Z., Chen, Y.P., 2005. Regional regulation of palatal growth and  
404 patterning along the anterior-posterior axis in mice. *J Anat* 207, 655-667.
- 405 Hu, L., Liu, J., Li, Z., Ozturk, F., Gurumurthy, C., Romano, R.A., Sinha, S., Nawshad, A., 2015. TGF $\beta$ 3  
406 regulates periderm removal through  $\Delta$ Np63 in the developing palate. *J Cell Physiol* 230, 1212-1225.
- 407 Huang, G., Shigesada, K., Ito, K., Wee, H.J., Yokomizo, T., Ito, Y., 2001. Dimerization with PEBP2beta  
408 protects RUNX1/AML1 from ubiquitin-proteasome-mediated degradation. *EMBO J* 20, 723-733.
- 409 Khan, A., Hyde, R.K., Dutra, A., Mohide, P., Liu, P., 2006. Core binding factor beta (CBFB)  
410 haploinsufficiency due to an interstitial deletion at 16q21q22 resulting in delayed cranial ossification,  
411 cleft palate, congenital heart anomalies, and feeding difficulties but favorable outcome. *Am J Med*  
412 *Genet A* 140, 2349-2354.
- 413 Kurosaka, H., Islam, M.N., Kuremoto, K., Hayano, S., Nakamura, M., Kawanabe, N., Yanagita, T., Rice,  
414 D.P., Harada, H., Taniuchi, I., Yamashiro, T., 2011. Core binding factor beta functions in the  
415 maintenance of stem cells and orchestrates continuous proliferation and differentiation in mouse  
416 incisors. *Stem Cells* 29, 1792-1803.
- 417 Lane, J., Yumoto, K., Azhar, M., Ninomiya-Tsuji, J., Inagaki, M., Hu, Y., Deng, C.X., Kim, J., Mishina, Y.,  
418 Kaartinen, V., 2015. Tak1, Smad4 and Trim33 redundantly mediate TGF- $\beta$ 3 signaling during palate  
419 development. *Dev Biol* 398, 231-241.
- 420 Li, Q., Ding, J., 2007. Gene expression analysis reveals that formation of the mouse anterior secondary  
421 palate involves recruitment of cells from the posterior side. *Int J Dev Biol* 51, 167-172.
- 422 McKenzie, F., Turner, A., Withers, S., Dalzell, P., McGlynn, M., Kirk, E.P., 2002. Dominant inheritance of  
423 cleft palate, microstomia and micrognathia--possible linkage to the fragile site at 16q22 (FRA16B).  
424 *Clin Dysmorphol* 11, 237-241.
- 425 Millacura, N., Pardo, R., Cifuentes, L., Suazo, J., 2017. Effects of folic acid fortification on orofacial clefts  
426 prevalence: a meta-analysis. *Public Health Nutr* 20, 2260-2268.
- 427 Murray, J.C., 2002. Gene/environment causes of cleft lip and/or palate. *Clin Genet* 61, 248-256.
- 428 Obican, S.G., Finnell, R.H., Mills, J.L., Shaw, G.M., Scialli, A.R., 2010. Folic acid in early pregnancy: a  
429 public health success story. *FASEB J* 24, 4167-4174.

- 430 Ogawa, E., Inuzuka, M., Maruyama, M., Satake, M., Naito-Fujimoto, M., Ito, Y., Shigesada, K., 1993.  
431 Molecular cloning and characterization of PEBP2 beta, the heterodimeric partner of a novel  
432 *Drosophila* runt-related DNA binding protein PEBP2 alpha. *Virology* 194, 314-331.
- 433 Richardson, R.J., Hammond, N.L., Coulombe, P.A., Saloranta, C., Nousiainen, H.O., Salonen, R., Berry,  
434 A., Hanley, N., Headon, D., Karikoski, R., Dixon, M.J., 2014. Periderm prevents pathological epithelial  
435 adhesions during embryogenesis. *J Clin Invest* 124, 3891-3900.
- 436 Sarper, S.E., Kurosaka, H., Inubushi, T., Ono Minagi, H., Kuremoto, K.I., Sakai, T., Taniuchi, I.,  
437 Yamashiro, T., 2018. Runx1-Stat3-Tgfb3 signaling network regulating the anterior palatal  
438 development. *Sci Rep* 8, 11208.
- 439 Sasaki, K., Yagi, H., Bronson, R.T., Tominaga, K., Matsunashi, T., Deguchi, K., Tani, Y., Kishimoto, T.,  
440 Komori, T., 1996. Absence of fetal liver hematopoiesis in mice deficient in transcriptional coactivator  
441 core binding factor beta. *Proc Natl Acad Sci U S A* 93, 12359-12363.
- 442 Tsoutsou, E., Tzetis, M., Giannikou, K., Syrmou, A., Oikonomakis, V., Kosma, K., Kanioura, A.,  
443 Kanavakis, E., Fryssira, H., 2013. Array-CGH revealed one of the smallest 16q21q22.1  
444 microdeletions in a female patient with psychomotor retardation. *Eur J Paediatr Neurol* 17, 316-320.
- 445 Wang, S., Wang, Q., Crute, B.E., Melnikova, I.N., Keller, S.R., Speck, N.A., 1993. Cloning and  
446 characterization of subunits of the T-cell receptor and murine leukemia virus enhancer core-binding  
447 factor. *Mol Cell Biol* 13, 3324-3339.
- 448 Wehby, G.L., Murray, J.C., 2010. Folic acid and orofacial clefts: a review of the evidence. *Oral Dis* 16,  
449 11-19.
- 450 Wei, T., Jia, W., Qian, Z., Zhao, L., Yu, Y., Li, L., Wang, C., Zhang, W., Liu, Q., Yang, D., Wang, G.,  
451 Wang, Z., Wang, K., Duan, T., Kang, J., 2017. Folic Acid Supports Pluripotency and Reprogramming  
452 by Regulating LIF/STAT3 and MAPK/ERK Signaling. *Stem Cells Dev* 26, 49-59.
- 453 Welsh, I.C., O'Brien, T.P., 2009. Signaling integration in the rugae growth zone directs sequential SHH  
454 signaling center formation during the rostral outgrowth of the palate. *Dev Biol* 336, 53-67.
- 455 Xu, X., Han, J., Ito, Y., Bringas, P., Urata, M.M., Chai, Y., 2006. Cell autonomous requirement for Tgfb2  
456 in the disappearance of medial edge epithelium during palatal fusion. *Dev Biol* 297, 238-248.
- 457 Yamamoto, T., Dowa, Y., Ueda, H., Kawataki, M., Asou, T., Sasaki, Y., Harada, N., Matsumoto, N.,  
458 Matsuoka, R., Kurosawa, K., 2008. Tetralogy of Fallot associated with pulmonary atresia and major  
459 aortopulmonary collateral arteries in a patient with interstitial deletion of 16q21-q22.1. *Am J Med*  
460 *Genet A* 146A, 1575-1580.

461 Yoshida, C.A., Furuichi, T., Fujita, T., Fukuyama, R., Kanatani, N., Kobayashi, S., Satake, M., Takada,  
462 K., Komori, T., 2002. Core-binding factor beta interacts with Runx2 and is required for skeletal  
463 development. *Nat Genet* 32, 633-638.

464

465 **Legends to Figures**

466 **Figure 1. Palatal phenotypes of *K14-Cre/Cbfb<sup>fl/fl</sup>* mice.** (A-D) Occlusal views of control and *Cbfb*  
467 mutant mouse palates. An anterior cleft palate was evident at the boundary between the primary and  
468 secondary palates in *Cbfb* mutant palates both at P50 (A,B) and P0 (C,D). The arrowheads indicate the  
469 cleft. Scale bar: 400  $\mu$ m. (E) The table indicates the frequency of anterior cleft in control and *Cbfb* mutant  
470 mice at P0. (F) The diagram shows the occlusal view of the palate and the section positions as indicated  
471 by the lines. (G-L) Histological sections at E17.0 revealed that the palatal shelves of *Cbfb* mutant mice  
472 did not make contact at the boundary between the primary and secondary palate (G,H,J,K). In the more  
473 posterior region, the secondary palate was fused completely, however, the fused palate did not make  
474 contact with the inferior border of the nasal septum (I,L). Arrowheads indicate the failure of fusion. Scale  
475 bar: 200  $\mu$ m.

476

477 **Figure 2. Palatal phenotypes in *Cbfb* mutant mice.** (A,B) Immunostaining for K14 during the  
478 anterior palatogenesis at E15.0. In controls, K14-labeled epithelial seams were formed at the  
479 boundary between the primary and secondary palate (A). In *Cbfb* mutants, K14-labeled epithelial  
480 remnants were retained on the contacting palatal shelves (B). Scale bar: 100  $\mu$ m. (C,D) Double  
481 immunohistochemical staining for Ki67 (green) and K14 (red) showed that Ki67 signals were sparse in  
482 the epithelial remnants in the wild-type palates (C), while some Ki67-positive epithelium were retained in  
483 *Cbfb* mutants (arrowheads in D). Scale bar: 50  $\mu$ m. (E) There were significantly more Ki67-positive  
484 epithelial cells in the *Cbfb* mutants than in the wild-type palates. (F,G) TUNEL-positive cells were evident  
485 at the epithelial remnants localized at the boundary between the primary and the secondary palate in  
486 wild-type (F), while the epithelial remnants were less in *Cbfb* mutants (G). Scale bar: 200  $\mu$ m. (H) The  
487 percentage of the TUNEL positive cells was significantly lower in the *Cbfb* mutants. (I,J)  
488 Immunohistochemical staining for K6 (green) revealed that K6-positive periderms were retained on the

489 unfused epithelial surface of the nasal side of the secondary palate and the nasal septum. The nuclei  
490 were counterstained with DAPI (blue). The arrowhead indicates persistent periderm. The diagram shows  
491 the section positions. Scale bar: 100  $\mu$ m. pp, primary palate; sp, secondary palate; ns, nasal septum.

492

493 **Figure 3. Gene expression during palatogenesis in *Cbfb* mutants.** (A-F) Expression of *Cbfb*, *Runx1*,  
494 *Runx2* and *Runx3* in the developing palate of the wild-type. *Cbfb* was widely distributed along the AP  
495 axis and not specifically in the anterior regions as shown by whole-mount in situ hybridization (A,B) *Cbfb*  
496 was expressed both in the epithelium and the mesenchyme. (D-F) Whole-mount in situ hybridization of  
497 *Runx1* (D), *Runx2* (E) and *Runx3* (F) mRNA in the developing palate of wild-type mice. (G-N) Whole-  
498 mount in situ hybridization of *Shox2* (G,H), *Msx1* (I,J) and *Bmp4* (K,L) and *Shh* (M,N) mRNA in the  
499 developing palate of *Cbfb* mutant and wild-type mice. The *Shox2*, *Msx1*, *Shh* and *Bmp4* expression was  
500 not altered by *Cbfb* deficiency. (O,P) Whole-mount in situ hybridization of *Tgfb3*. The *Tgfb3* expression  
501 was markedly downregulated at the fusing epithelium at the primary palate and at the anterior-most  
502 portion of the secondary palate in *Cbfb* mutant mice. (Q,R,T,U) Higher magnification of whole-mount s  
503 images of the *Tgfb3* (inset of panel O and P) and *Mmp13*. The expression of both *Tgfb3* and *Mmp13*  
504 was markedly disturbed in *Cbfb* mutants (arrows). Scale bar: 500  $\mu$ m. (S,V) qPCR analysis confirmed  
505 the remarkable downregulation of *Tgfb3* (S) and *Mmp13* (V) in *Cbfb* mutants. Scale bar: 100  $\mu$ m. Error  
506 bars, \*,  $p < 0.05$ ; pp, primary palate; sp, secondary palate; ns, nasal septum. if, incisive foramen.

507

508 **Figure 4. TGFB3 rescues cleft palate of *Cbfb* mutants.** (A) Histological sections showed that failure of  
509 the palatal fusion in *Cbfb* mutants was partially rescued by TGFB3 protein beads in culture  
510 (Arrowheads). (B) The rescue ration of the cleft palate in *Cbfb* mutants by TGFB3 application. (C,D)  
511 qPCR analysis of the microdissected primary palate in *Cbfb* mutants demonstrated that the expression  
512 of *Tgfb3* and *Mmp13* was significantly upregulated by the folic acid application. pp, primary palate; sp,  
513 secondary palate. Error bars, \* $p < 0.05$ .



514

515 **Figure 5. Stat3 activation in the *Cbfb* mutant palate.** (A-D) Immunofluorescence analysis of Stat3  
516 (green) and phosphorylated Stat3 (pStat3, green) in control (A, C) and *Cbfb* mutant mice (B, D). The  
517 nuclei were counterstained with DAPI (blue). pStat3 immunoreactivity was downregulated specifically at  
518 the anterior region of the palate (arrowheads in D). Scale bar: 100  $\mu$ m. (E) A western blot confirmed that  
519 the pStat3 immunoreactivity was specifically downregulated in the primary palate of *Cbfb* mutants.

520

521 **Figure 6. Folic acid application rescues cleft palate of *Cbfb* mutants.** (A) Histological sections  
522 showed that failure of the palatal fusion in *Cbfb* mutants was partially rescued by folic acid application in  
523 culture (Arrowheads). (B) The rescue ration of the cleft palate in *Cbfb* mutants using folic acid. (C) A  
524 western blot analysis confirmed that the pStat3 immunoreactivity was upregulated by folic acid  
525 application (FA) in the primary palate of *Cbfb* mutants. (D,E) qPCR demonstrated folic acid application  
526 (FA) significantly upregulated in the palatal tissues of *Cbfb* mutants *in vitro*. pp, primary palate; sp,  
527 secondary palate. Error bars, \* $p < 0.05$ .

528

529 **Figure 7. A schema of the key findings.** Runx1/*Cbfb*-Stat3-*Tgfb3* signaling regulates the fusion of  
530 the anterior palate. (A) In the fusing palatal epithelium of the wild-type palate, Runx1/*Cbfb* is involved in  
531 regulation of Stat3 phosphorylation, which further regulates the *Tgfb3* in the anterior region of the palate.  
532 (B) *Runx1* mutants exhibit anterior clefting and *Tgfb3* expression is remarkably disturbed in the primary  
533 palate with downregulation of Stat3 phosphorylation, as shown previously (Sarper et al., 2018). (C)  
534 *Cbfb* mutant mice also display an anterior cleft palate with the downregulate *Tgfb3* expression and the  
535 suppressed Stat3 phosphorylation. (D) The anterior cleft palate in *Cbfb* mutants is rescued by  
536 pharmaceutical application of folic acid that activates suppressed Stat3 phosphorylation and *Tgfb3*  
537 expression.

## Figures

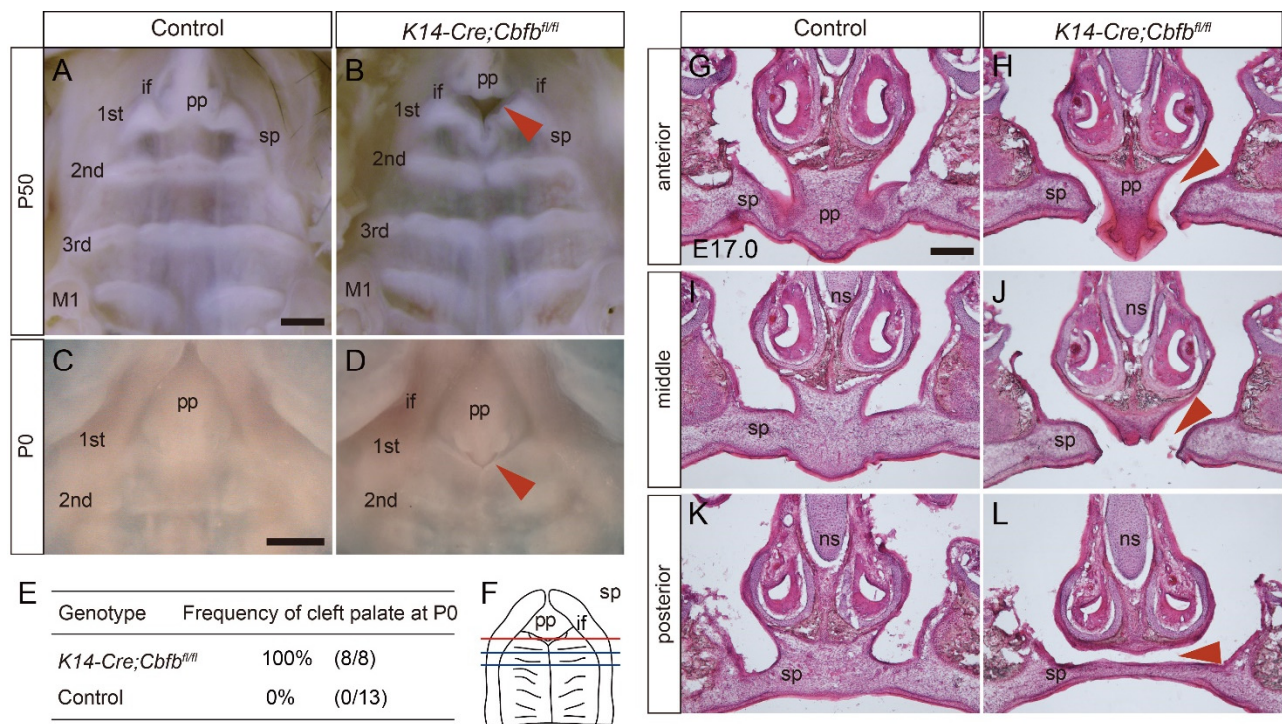

**Figure 1. Palatal phenotypes of *K14-Cre/Cbfb<sup>fl/fl</sup>* mice.** (A-D) Occlusal views of control and *Cbfb* mutant mouse palates. An anterior cleft palate was evident at the boundary between the primary and secondary palates in *Cbfb* mutant palates both at P50 (A,B) and P0 (C,D). The arrowheads indicate the cleft. Scale bar: 400  $\mu$ m. (E) The table indicates the frequency of anterior cleft in control and *Cbfb* mutant mice at P0. (F) The diagram shows the occlusal view of the palate and the section positions as indicated by the lines. (G-L) Histological sections at E17.0 revealed that the palatal shelves of *Cbfb* mutant mice did not make contact at the boundary between the primary and secondary palate (G,H,J,K). In the more posterior region, the secondary palate was fused completely, however, the fused palate did not make contact with the inferior border of the nasal septum (I,L). Arrowheads indicate the failure of fusion. Scale bar: 200  $\mu$ m.

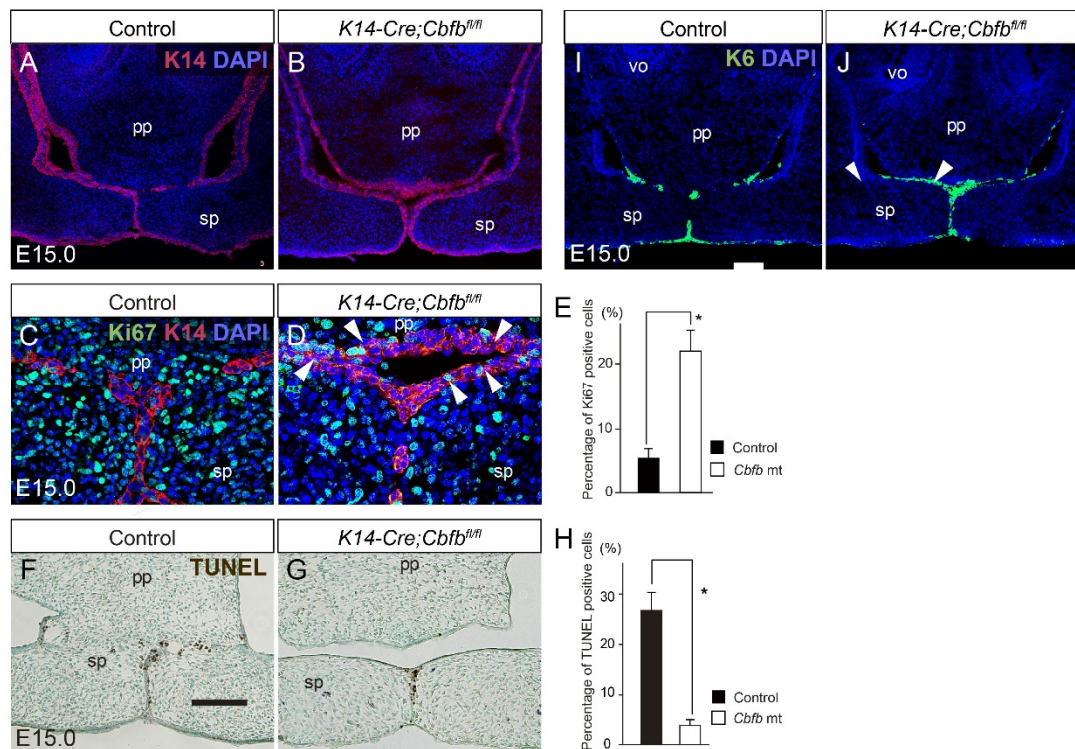

**Figure 2. Palatal phenotypes in *Cbfb* mutant mice.** (A,B) Immunostaining for K14 during the anterior palatogenesis at E15.0. In controls, K14-labeled epithelial seams were formed at the boundary between the primary and secondary palate (A). In *Cbfb* mutants, K14-labeled epithelial remnants were retained on the contacting palatal shelves (B). Scale bar: 100  $\mu$ m. (C,D) Double immunohistochemical staining for Ki67 (green) and K14 (red) showed that Ki67 signals were sparse in the epithelial remnants in the wild-type palates (C), while some Ki67-positive epithelium were retained in *Cbfb* mutants (arrowheads in D). Scale bar: 50  $\mu$ m. (E) There were significantly more Ki67-positive epithelial cells in the *Cbfb* mutants than in the wild-type palates. (F,G) TUNEL-positive cells were evident at the epithelial remnants localized at the boundary between the primary and the secondary palate in wild-type (F), while the epithelial remnants were less in *Cbfb* mutants (G). Scale bar: 200  $\mu$ m. (H) The percentage of the TUNEL positive cells was significantly lower in the *Cbfb* mutants. (I,J) Immunohistochemical staining for K17 (green) revealed that K17-positive periderms were retained on the unfused epithelial surface of the nasal side of the secondary palate and the nasal septum. The nuclei were counterstained with DAPI (blue). The arrowhead indicates persistent periderm. The diagram shows the section positions. Scale bar: 100  $\mu$ m. pp, primary palate; sp, secondary palate; ns, nasal septum.

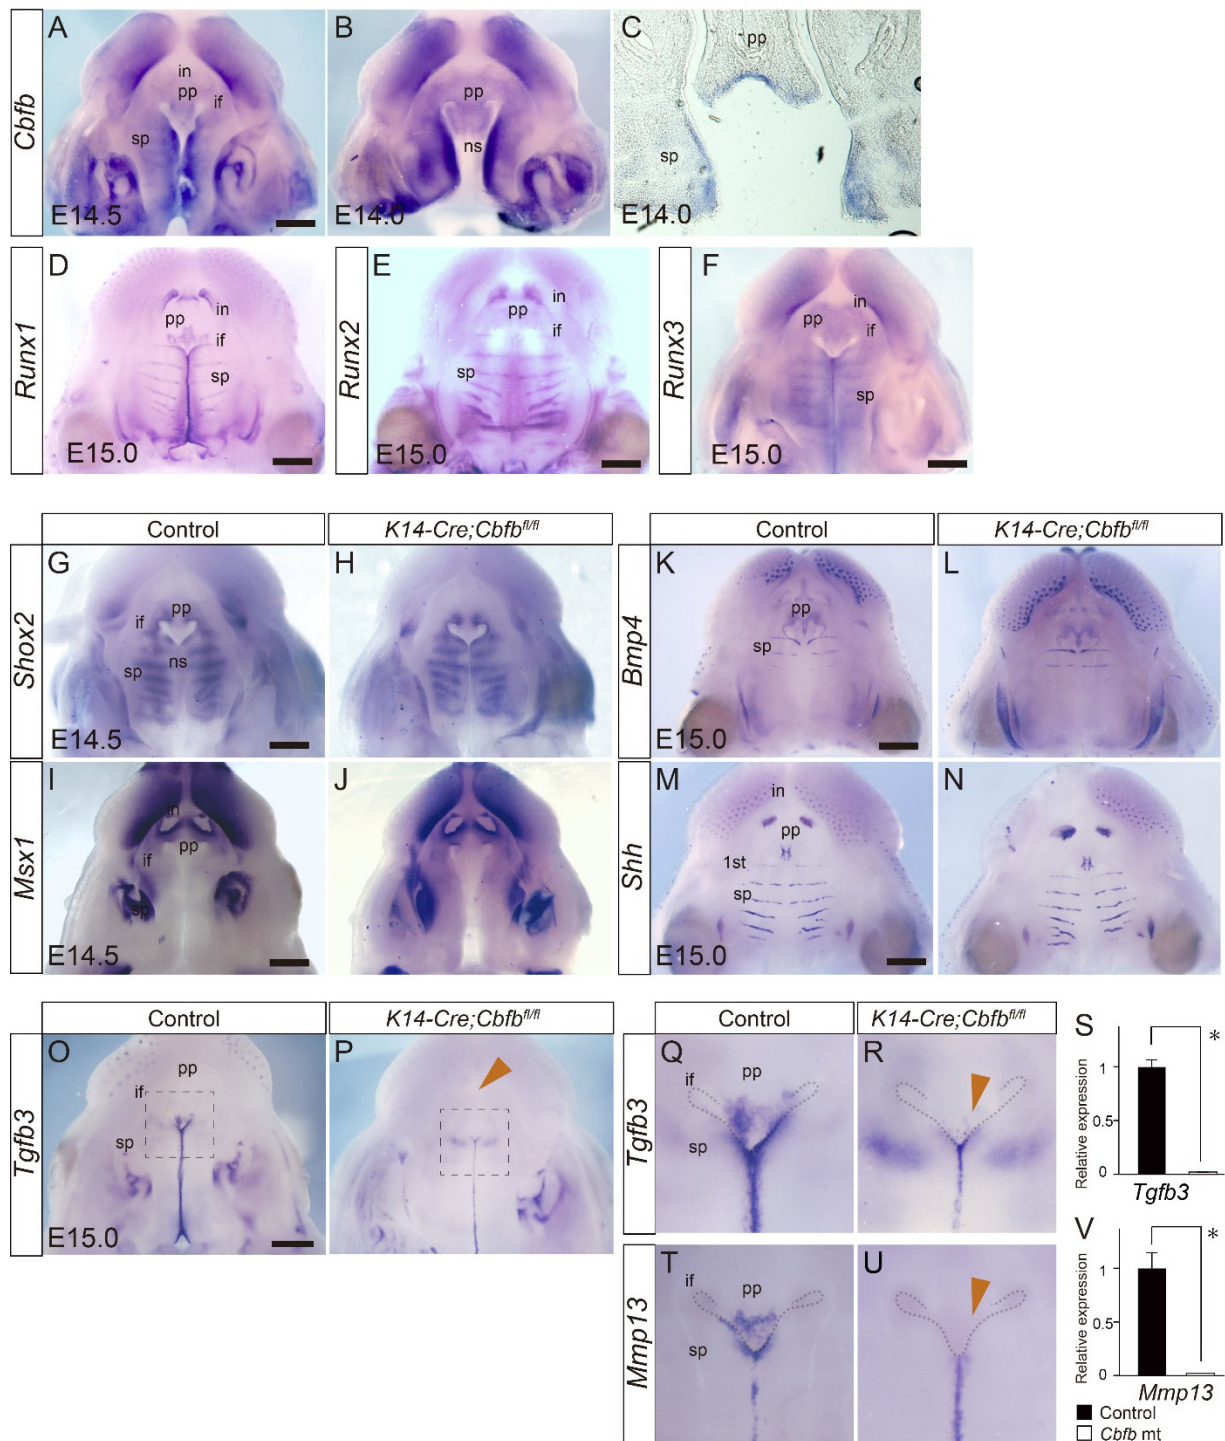

**Figure 3. Gene expression during palatogenesis in *Cbfb* mutants.** (A-F) Expression of *Cbfb*, *Runx1*, *Runx2* and *Runx3* in the developing palate of the wild-type. *Cbfb* was widely distributed along the AP axis and not specifically in the anterior regions as shown by whole-mount in situ hybridization (A,B) *Cbfb* was expressed both in the epithelium and the mesenchyme. (D-F) Whole-mount in situ hybridization of

*Runx1* (D), *Runx2* (E) and *Runx3* (F) mRNA in the developing palate of wild-type mice. (G-N) Whole-mount in situ hybridization of *Shox2* (G,H), *Msx1* (I,J) and *Bmp4* (K,L) and *Shh* (M,N) mRNA in the developing palate of *Cbfb* mutant and wild-type mice. The *Shox2*, *Msx1*, *Shh* and *Bmp4* expression was not altered by *Cbfb* deficiency. (O,P) Whole-mount in situ hybridization of *Tgfb3*. The *Tgfb3* expression was markedly downregulated at the fusing epithelium at the primary palate and at the anterior-most portion of the secondary palate in *Cbfb* mutant mice. (Q,R,T,U) Higher magnification of whole-mount s images of the *Tgfb3* (inset of panel O and P) and *Mmp13*. The expression of both *Tgfb3* and *Mmp13* was markedly disturbed in *Cbfb* mutants (arrows). Scale bar: 500  $\mu$ m. (S,V) qPCR analysis confirmed the remarkable downregulation of *Tgfb3* (S) and *Mmp13* (V) in *Cbfb* mutants. Scale bar: 100  $\mu$ m. Error bars, \*,  $p < 0.05$ ; pp, primary palate; sp, secondary palate; ns, nasal septum. if, incisive foramen.

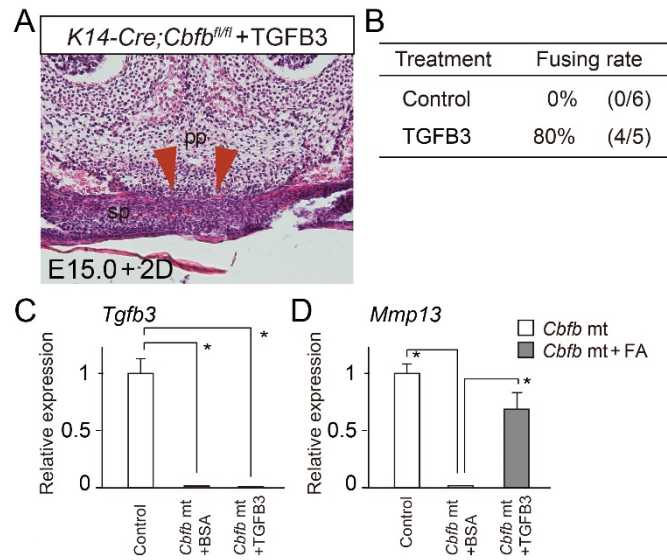

**Figure 4. TGFB3 rescues cleft palate of *Cbfb* mutants.** (A) Histological sections showed that failure of the palatal fusion in *Cbfb* mutants was partially rescued by TGFB3 protein beads in culture (Arrowheads). (B) The rescue ration of the cleft palate in *Cbfb* mutants by TGFB3 application. (C,D) qPCR analysis of the microdissected primary palate in *Cbfb* mutants demonstrated that the expression of *Tgfb3* and *Mmp13* was significantly upregulated by the folic acid application. pp, primary palate; sp, secondary palate. Error bars, \* $p < 0.05$ .

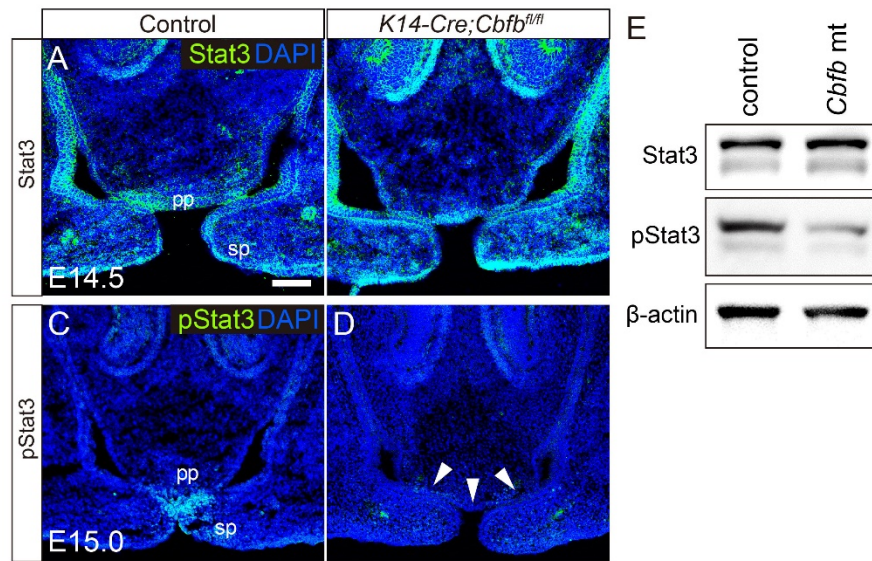

**Figure 5. Stat3 activation in the *Cbfb* mutant palate.** (A-D) Immunofluorescence analysis of Stat3 (green) and phosphorylated Stat3 (pStat3, green) in control (A, C) and *Cbfb* mutant mice (B, D). The nuclei were counterstained with DAPI (blue). pStat3 immunoreactivity was downregulated specifically at the anterior region of the palate (arrowheads in D). Scale bar: 100  $\mu$ m. (E) A western blot confirmed that the pStat3 immunoreactivity was specifically downregulated in the primary palate of *Cbfb* mutants.

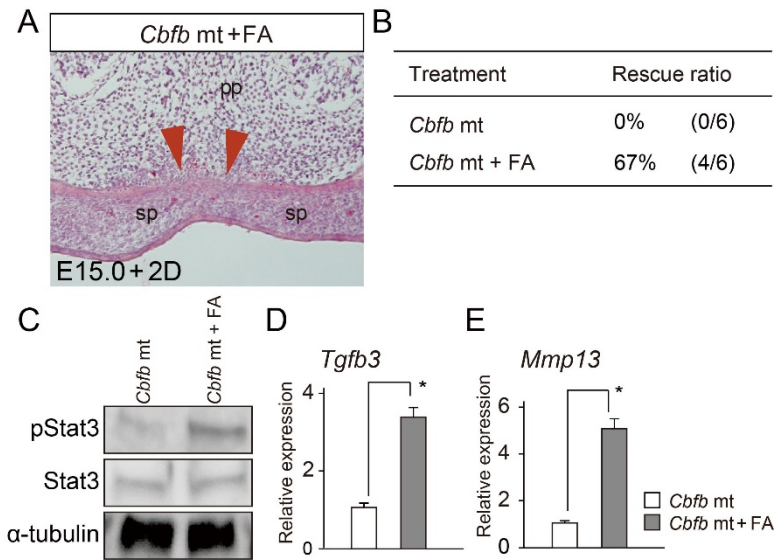

**Figure 6. Folic acid application rescues cleft palate of *Cbfb* mutants.** (A) Histological sections showed that failure of the palatal fusion in *Cbfb* mutants was partially rescued by folic acid application in culture (Arrowheads). (B) The rescue ratio of the cleft palate in *Cbfb* mutants using folic acid. (C) A western blot analysis confirmed that the pStat3 immunoreactivity was upregulated by folic acid application (FA) in the primary palate of *Cbfb* mutants. (D,E) qPCR demonstrated folic acid application (FA) significantly upregulated in the palatal tissues of *Cbfb* mutants *in vitro*. pp, primary palate; sp, secondary palate. Error bars, \*p < 0.05.



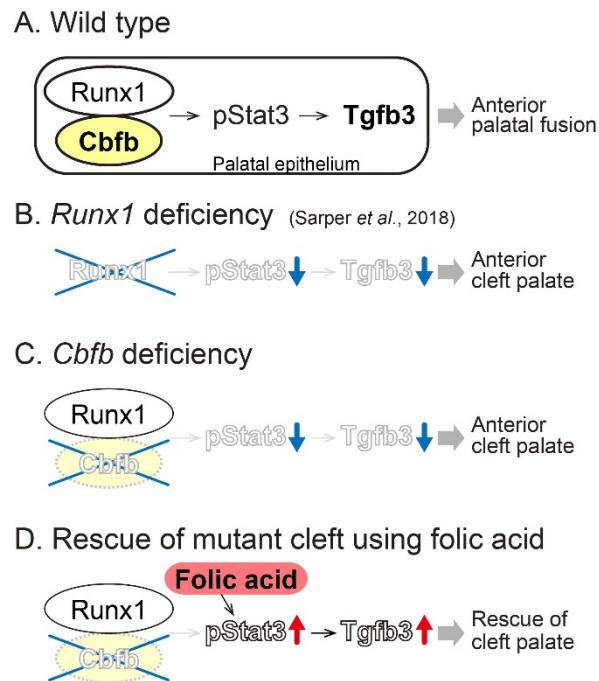

**Figure 7. A schema of the key findings.** Runx1/Cbfb-Stat3-Tgfb3 signaling regulates the fusion of the anterior palate. (A) In the fusing palatal epithelium of the wild-type palate, Runx1/Cbfb is involved in regulation of Stat3 phosphorylation, which further regulates the *Tgfb3* in the anterior region of the palate. (B) *Runx1* mutants exhibit anterior clefting and *Tgfb3* expression is remarkably disturbed in the primary palate with downregulation of Stat3 phosphorylation, as shown previously (Sarper et al., 2018). (C) *Cbfb* mutant mice also display an anterior cleft palate with the downregulate *Tgfb3* expression and the suppressed Stat3 phosphorylation. (D) The anterior cleft palate in *Cbfb* mutants is rescued by pharmaceutical application of folic acid that activates suppressed Stat3 phosphorylation and *Tgfb3* expression.
